# Supplementary material for: Clinical Characteristics of Peripheral Neuropathy in Eosinophilic Granulomatosis with Polyangiitis: A Retrospective Single‐Center Study in China
Source: Hindawi journal article supplement (doi:10.1155/2020/3530768), 2020-01-01
Supplement: f1 [file 3530768.f1.pdf]

Supplementary material

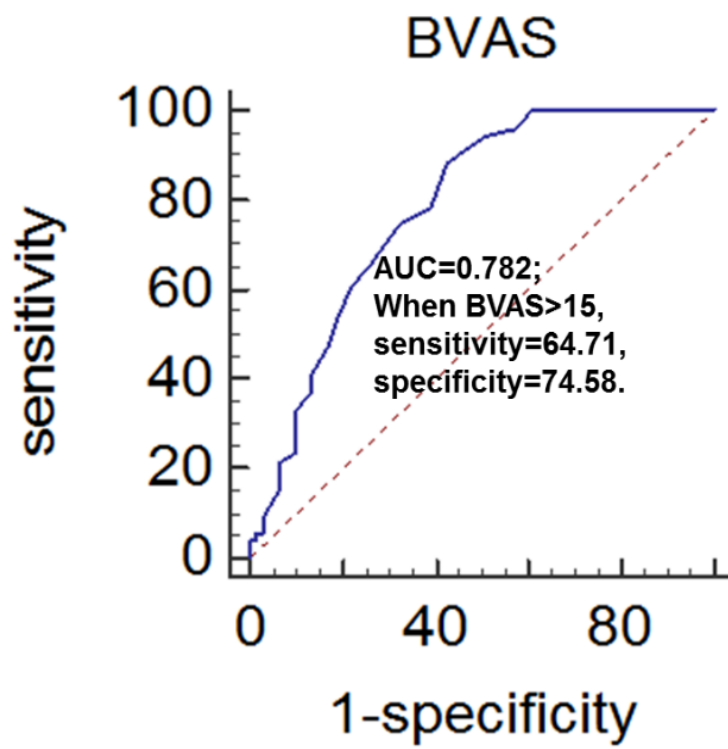

**Figure S1.** The receiver operating characteristic (ROC) curve for BVAS predicting PN in EGPA.
